# Supplementary material for: Optimizing Critical Illness Recovery: Perspectives and Solutions From the Caregivers of ICU Survivors
Source: PubMed Central journal article supplement — Crit Care Explor. 2021 May 12;3(5):e0420. doi: 10.1097/CCE.0000000000000420 (PMC8162533; doi:10.1097/cce.0000000000000420), 2021-05-12
Supplement: cc9-3-e0420-s002.pdf [file cc9-3-e0420-s002.pdf]

**Authors:** Sevin et al

**Manuscript:** Optimizing Critical Illness Recovery: Caregivers

**Study:** CAIRN: Collaborative Assessment of ICU Recovery Needs

## Supplementary File Two: Five Stages of the Data Analysis Process

| Stage | Process                                                                                                  |
|-------|----------------------------------------------------------------------------------------------------------|
| One   | Preliminary Sweeps of data<br>Development of initial coding                                              |
| Two   | Coding frameworks created                                                                                |
| Three | Initial coding built under key themes<br>Iterative checking of codes across the<br>interview transcripts |
| Four  | Definition and classification of key themes<br>Creation of conceptual frameworks                         |
| Five  | Extraction of quotes<br>Review of conceptual models                                                      |
